# Supplementary material
Source: Springer Nature journal article supplement (https://www.springermedizin.de/resource/supplementary/12985_2010_957_MOESM4_ESM.pdf/9608832)

72 h post-infection

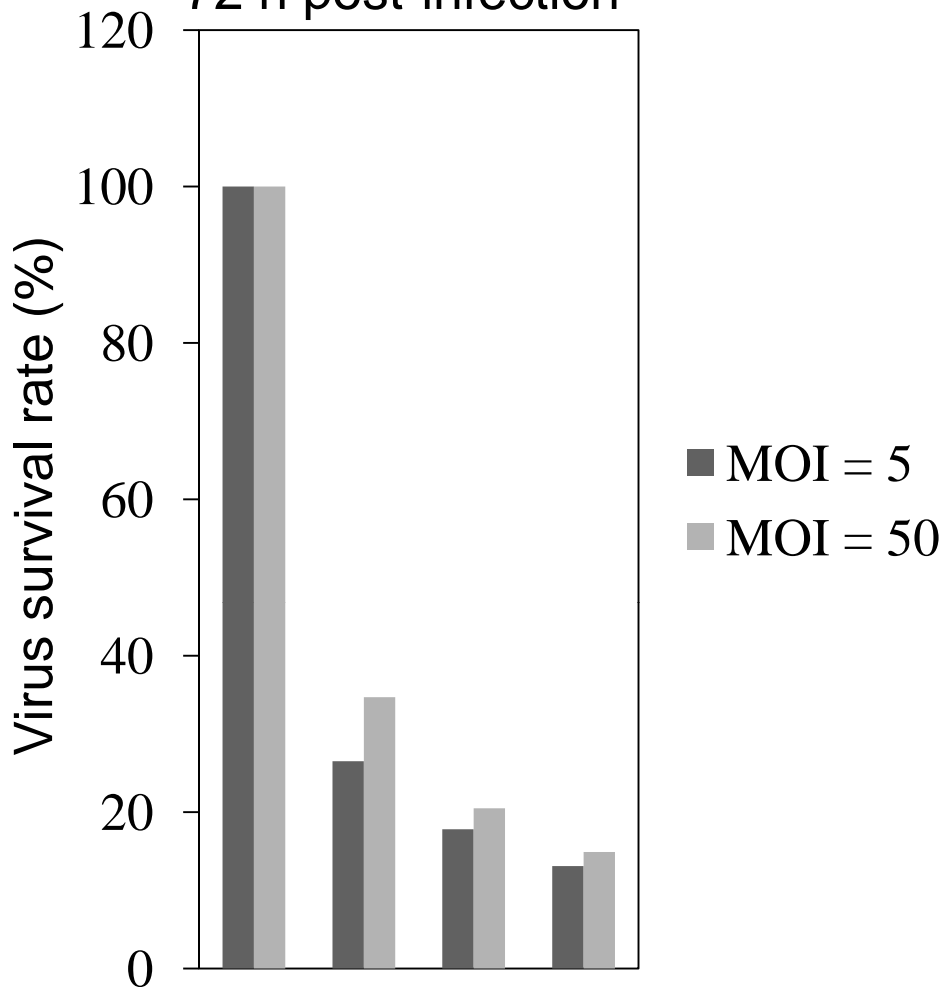

Amantadine 0 50 0 50 ( $\mu\text{g/mL}$ )  
IFN-alpha 0 0 100 100 (IU/mL)

Supplement: MOESM4 [file 9608832]
